# Supplementary material for: The role of local orbital hybridization in band gap opening and magnetism induced by single-atom doping in graphene
Source: Royal Society of Chemistry journal article supplement (doi:10.1039/d5cp00724k), 2025-01-01
Supplement: d5cp00724k1.pdf [file d5cp00724k1.pdf]

## Supplementary Information

### The Role of Local Orbital Hybridization in Band Gap Opening and Magnetism Induced by Single-Atom Doping in Graphene

Jianfei Xiang,<sup>a,b,c,d</sup> Huimin Hu<sup>\* a,b,c,d</sup> and Jin-Ho Choi<sup>\* a,b,c,d</sup>

- a. College of Energy, Soochow Institute for Energy and Materials InnovationS, Soochow University, Suzhou 215006, China.
- b. Key Laboratory of Advanced Carbon Materials and Wearable Energy Technologies of Jiangsu Province, Soochow University, Suzhou 215006, China.
- c. Key Laboratory of Core Technology of High Specific Energy Battery and Key Materials for Petroleum and Chemical Industry, Soochow University, Suzhou 215006, China.
- d. Key Laboratory of Advanced Negative Carbon Technologies, Soochow University, Suzhou 215123, China.

E-mail: hmhu@suda.edu.cn; jhchoi@suda.edu.cn

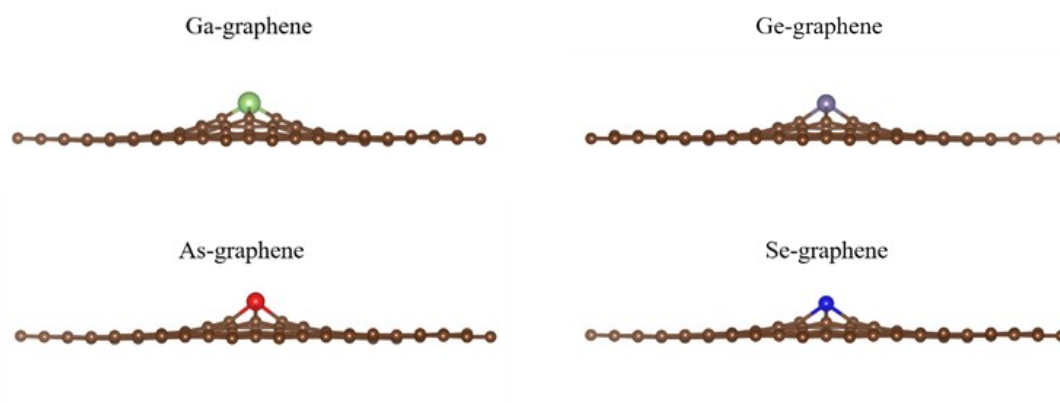

**Fig. S1** Side view of the optimized configurations for Ga-, Ge-, As-, and Se-doped graphene with fully cell relaxation.

**Table S1** Differences in total energy (per atom), hybrid bond length, and lattice constant between fixed and fully relaxed cell geometry optimization.

|             | Total energy<br>(meV) | Hybrid bond length<br>(Å) | Lattice constant<br>(Å) |
|-------------|-----------------------|---------------------------|-------------------------|
| Ga-graphene | -4.86                 | 0                         | 0.01                    |
| Ge-graphene | -5                    | 0                         | 0.01                    |
| As-graphene | -4.58                 | 0                         | 0                       |
| Se-graphene | -5                    | 0                         | 0.02                    |

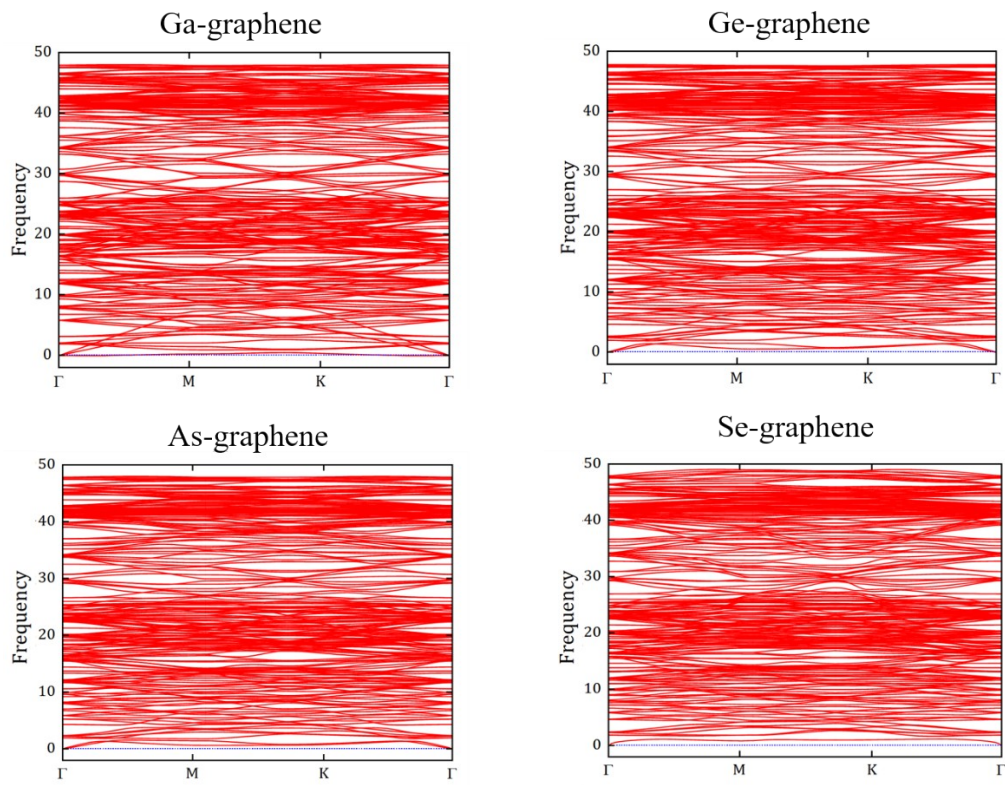

**Fig. S2** Phonon spectra of Ga-, Ge-, As- and Se-doped graphene systems.

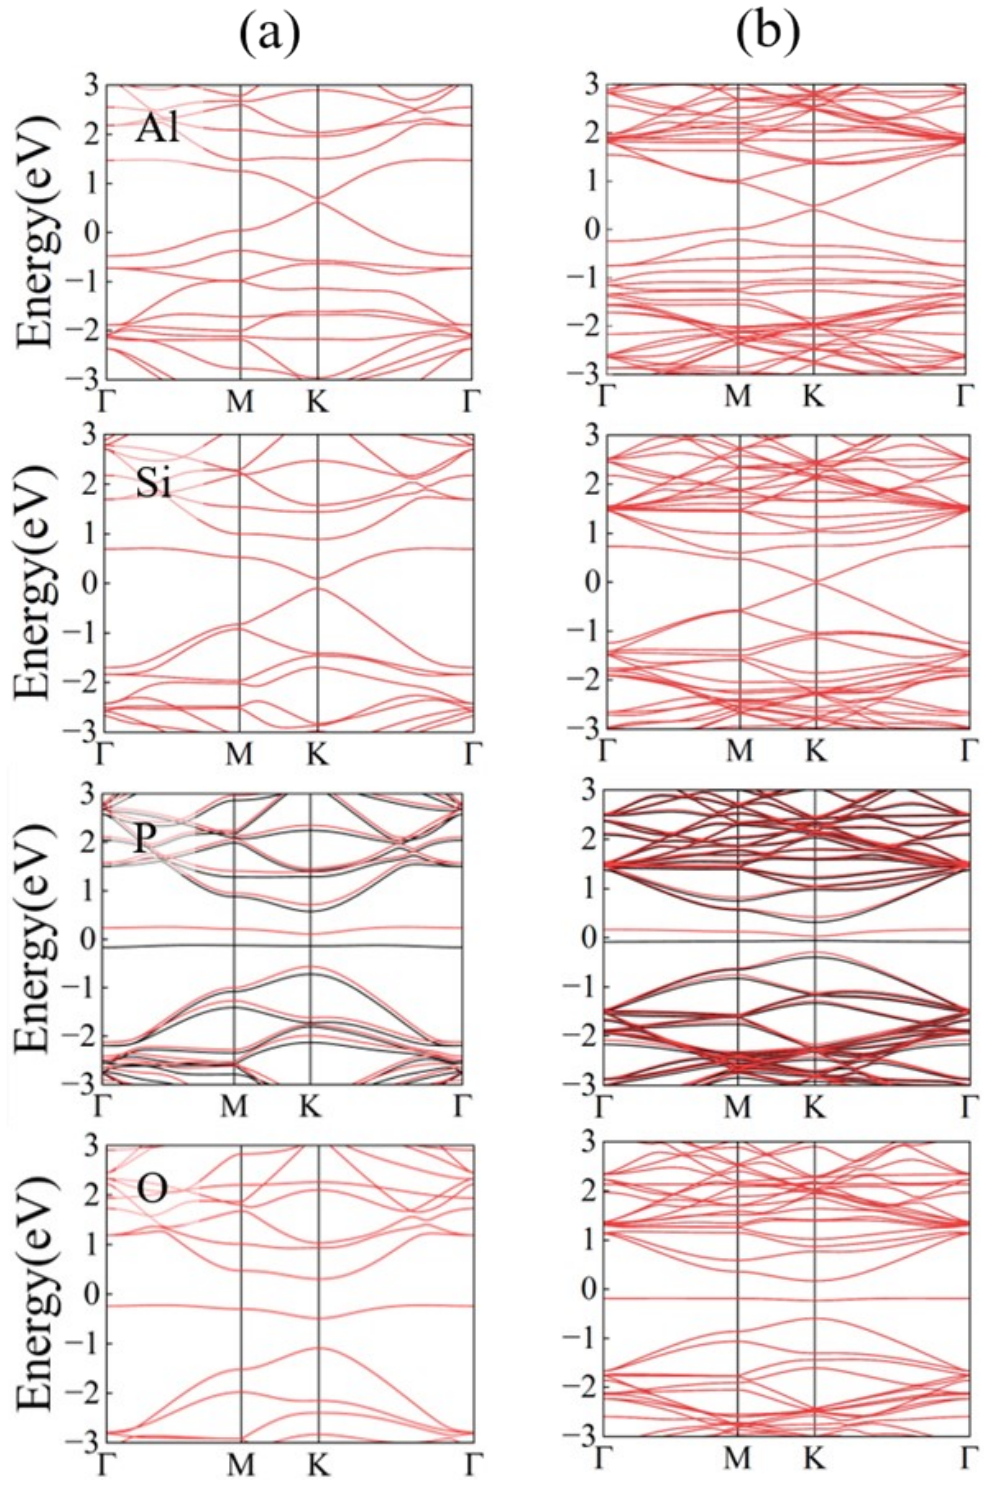

**Fig. S3** Spin-polarized band structures at (a) 3.1% and (b) 1.0% doping concentrations for Al- Si-, P-, and O-doped graphene.

**Table S2** Band gap values at different doping concentrations in Al- Si-, P-, and O-

doped graphene.

|              | Band gap (eV)       |                     |                     |
|--------------|---------------------|---------------------|---------------------|
|              | $4 \times 4$ (3.1%) | $6 \times 6$ (1.4%) | $7 \times 7$ (1.0%) |
| Al-graphene  | 0.030               | 0.004               | 0.013               |
| Si- graphene | 0.191               | 0.014               | 0.039               |
| P- graphene  | 0.693               | 0.008               | 0.352               |
| O- graphene  | 0.525               | 0.013               | 0.354               |

**Table S3** Band gap values obtained by PBE and HSE06 hybrid functional calculations.

|              | Band gap (eV) |       |
|--------------|---------------|-------|
|              | PBE           | HSE06 |
| Al-graphene  | 0.004         | 0.014 |
| Si- graphene | 0.014         | 0.067 |
| P- graphene  | 0.008         | 0.042 |
| O- graphene  | 0.013         | 0.022 |

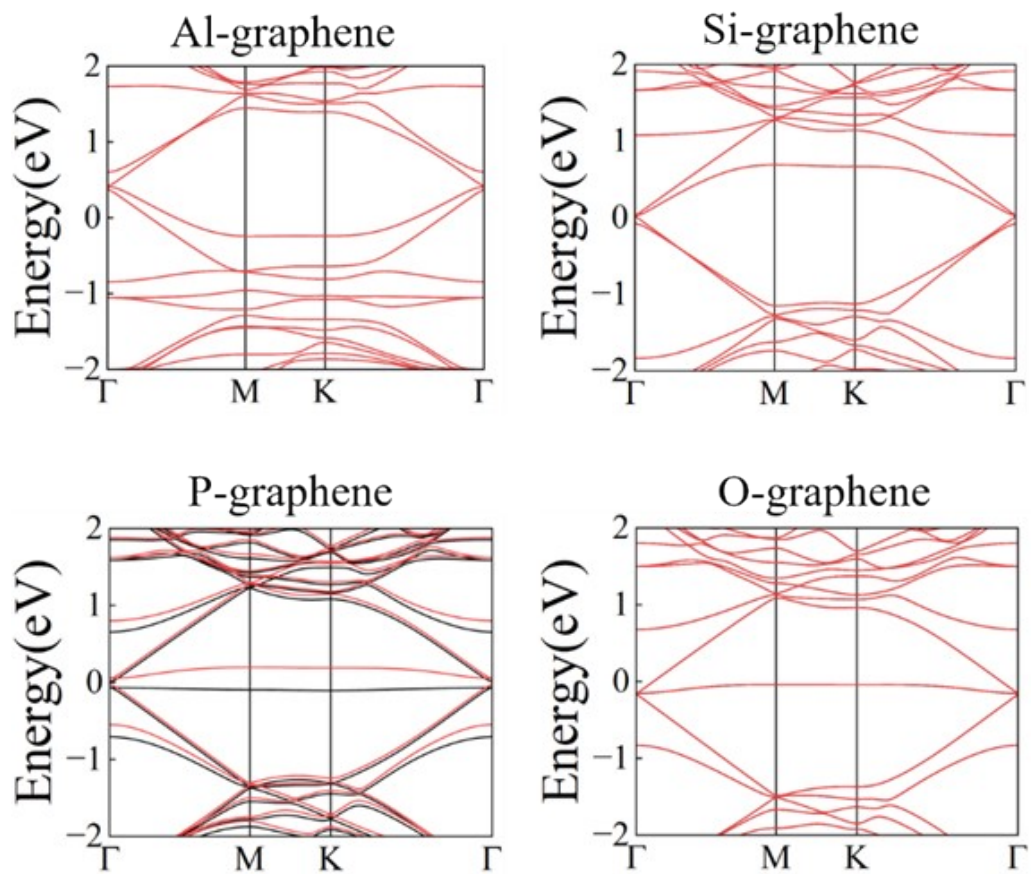

**Fig. S4** Band structure diagram obtained by HSE06 hybrid functional calculations.
